# Supplementary material for: Microwave-assisted synthesis of a thermally stable Zn-containing aluminophosphate with ERI-zeotype structure templated by diquaternary alkylammonium
Source: Royal Society of Chemistry journal article supplement (doi:10.1039/c4ra10541a), 2014-09-22
Supplement: c4ra10541a1.pdf [file c4ra10541a1.pdf]

## Supporting Information

### **Microwave-assisted synthesis of a thermally stable Zn-containing aluminophosphate with ERI-zeotype structure templated by diquaternary alkylammonium**

**Yan Xu,<sup>a,b</sup> Yuchen Qiu,<sup>a</sup> Yide Han,<sup>b</sup> Qiming Sun,<sup>a</sup> Rui Ge,<sup>a</sup> Xiaowei Song<sup>\*,a</sup>**

*<sup>a</sup> State Key Laboratory of Inorganic Synthesis and Preparative Chemistry, College of Chemistry, Jilin University, Changchun 130012, China*

*<sup>b</sup> Department of Chemistry, College of Science, Northeastern University, Shenyang 110819, China*

#### **Corresponding Author:**

Dr. Xiaowei Song

E-mail: xiaowei song@jlu.edu.cn

Fax: +86-431-85168582

Tel: +86-431-85168582

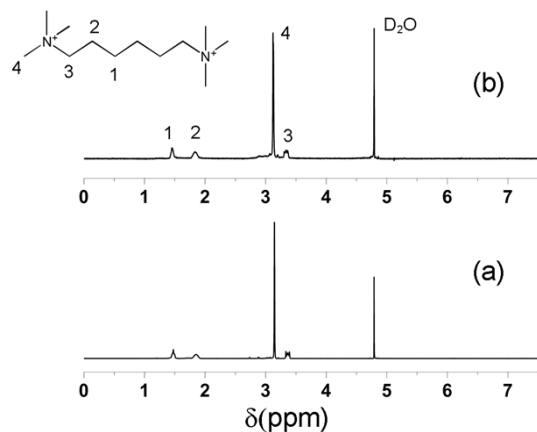

Figure S1.  $^1\text{H}$  NMR spectrum of (a) SDA molecules and (b) SDA molecules extracted after dissolving the ZnAPO-ERI-MW framework.

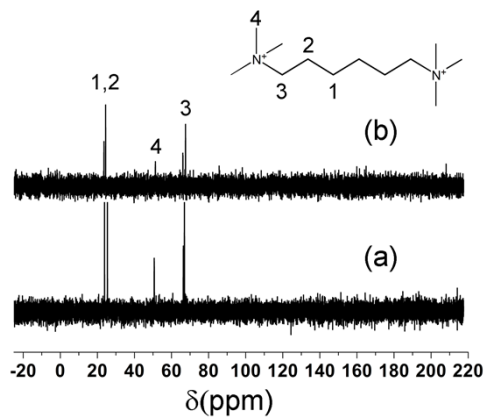

Figure S2.  $^{13}\text{C}$  NMR spectrum of (a) SDA molecules and (b) SDA molecules extracted after dissolving the ZnAPO-ERI-MW framework.

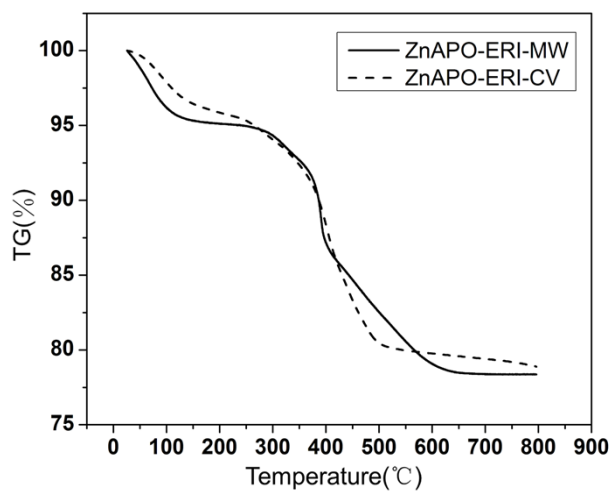

Figure S3. TG curves of ZnAPO-ERI-MW and ZnAPO-ERI-CV.

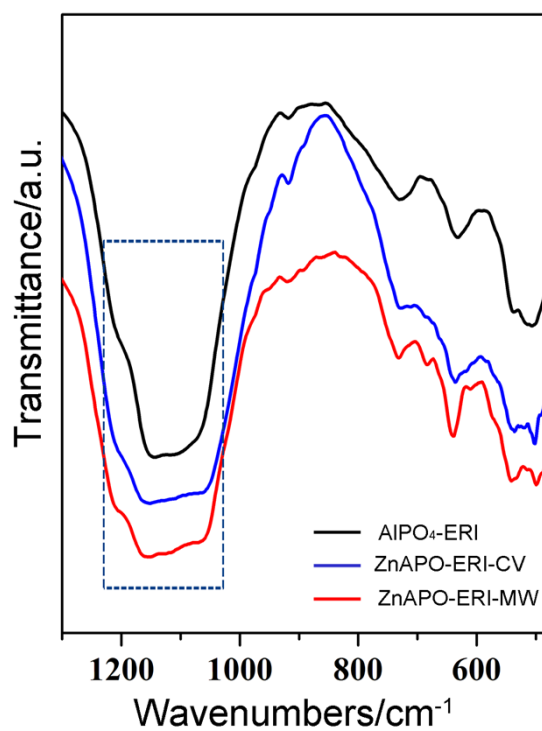

Figure S4. FT-IR spectra of  $\text{AlPO}_4\text{-ERI}$ ,  $\text{ZnAPO-ERI-CV}$  and  $\text{ZnAPO-ERI-MW}$  (Note: there is a significant broadening and small red shift in the T-O-T asymmetric stretching region (1030~1220  $\text{cm}^{-1}$ ) of the  $\text{ZnAPO-ERI-CV}$  and  $\text{ZnAPO-ERI-MW}$  spectra compared to the spectra of  $\text{AlPO}_4\text{-ERI}$ , which indicates that Zn is successfully involved in the aluminophate lattice).
